# Supplementary material
Source: PubMed Central journal article supplement (PMC3129855)
Supplement: NIHMS269750-supplement-supplement_1.pdf [file NIHMS269750-supplement-supplement_1.pdf]

Online Appendix Table 1a.

*Logistic Coefficients Predicting Provision of Specified Type of Help to Parents During the Past Month, Wisconsin Longitudinal Study Graduates, 1993 and 2004*

|                                                                         | Transportation,<br>Errands, Shopping |           | Housework,<br>Yardwork, Repairs |           | Advice,<br>Encouragement,<br>Emotional support |           |
|-------------------------------------------------------------------------|--------------------------------------|-----------|---------------------------------|-----------|------------------------------------------------|-----------|
|                                                                         | 1993                                 | 2004      | 1993                            | 2004      | 1993                                           | 2004      |
| Gender: Male                                                            | -0.34 *                              | -0.50 **  | 0.37 *                          | 0.09      | -0.73 ***                                      | -0.58 *** |
| Marital status                                                          |                                      |           |                                 |           |                                                |           |
| Currently married, first marriage                                       | ---                                  | ---       | ---                             | ---       | ---                                            | ---       |
| Currently married, second or later marriage                             | -0.42                                | -0.49     | -0.15                           | 0.32      | 0.16                                           | -0.40     |
| Previously married: Divorced/widowed/separated                          | -0.14                                | -0.18     | 0.31                            | -0.20     | -0.32                                          | 0.10      |
| Never married                                                           | -0.60                                | 0.28      | 0.40                            | 0.74      | -0.86                                          | 0.20      |
| Male * Currently married, second or later marriage                      | 0.32                                 | 0.37      | 0.12                            | -1.00 *   | -0.31                                          | 0.34      |
| Male * Previously married: Divorced/widowed/separated                   | -0.04                                | 0.01      | -0.46                           | -0.19     | -0.02                                          | -0.69     |
| Male * Never married                                                    | 0.23                                 | -0.06     | 0.38                            | -0.75     | 1.33                                           | -0.10     |
| Employment status                                                       |                                      |           |                                 |           |                                                |           |
| Not currently employed                                                  | ---                                  | ---       | ---                             | ---       | ---                                            | ---       |
| Currently employed part-time                                            | -0.35                                | 0.04      | -0.47                           | 0.01      | -0.06                                          | -0.07     |
| Currently employed full-time                                            | -0.60 **                             | -0.27     | -0.26                           | -0.29     | -0.21                                          | -0.03     |
| Education: Years of education based on highest degree                   |                                      |           |                                 |           |                                                |           |
| High school grad or less than 1 year college                            | ---                                  | ---       | ---                             | ---       | ---                                            | ---       |
| 1-3 years college                                                       | 0.37 *                               | 0.40 *    | 0.28                            | -0.05     | 0.41 *                                         | 0.33      |
| Bachelor's degree                                                       | 0.62 **                              | 0.13      | 0.54 *                          | 0.10      | 0.99 ***                                       | 0.68 ***  |
| More than bachelor's degree                                             | 0.52 *                               | 0.31      | 0.29                            | -0.17     | 1.02 ***                                       | 0.64 ***  |
| Household income in last 12 months                                      |                                      |           |                                 |           |                                                |           |
| <=\$25,000                                                              | ---                                  | ---       | ---                             | ---       | ---                                            | ---       |
| \$25,001-\$50,000                                                       | 0.06                                 | 0.11      | 0.06                            | -0.24     | 0.08                                           | -0.10     |
| \$50,001-\$75,000                                                       | 0.02                                 | 0.37      | 0.06                            | -0.13     | -0.01                                          | 0.21      |
| \$75,001-\$100,000                                                      | 0.03                                 | 0.39      | 0.03                            | -0.41     | -0.12                                          | 0.23      |
| >\$100,000                                                              | 0.28                                 | 0.47 *    | 0.00                            | -0.37     | 0.18                                           | 0.31      |
| Health status: Poor/very poor (0 = <i>Excellent/good/fair</i> )         | 0.08                                 | -0.11     | -0.85                           | -0.74 *   | -0.71                                          | -0.03     |
| Coresident children (0 = <i>No children or no coresident children</i> ) | -0.24                                | -0.64 **  | 0.07                            | -0.29     | -0.25                                          | -0.09     |
| Number of married children                                              | 0.05                                 | 0.03      | -0.02                           | -0.01     | -0.10                                          | 0.07      |
| Parent's residence                                                      |                                      |           |                                 |           |                                                |           |
| In own home (0 = <i>With graduate or other living situation</i> )       | -0.08                                | 0.59 ***  | 0.16                            | 1.36 ***  | 0.18                                           | 0.18      |
| Proximity to parent's residence                                         |                                      |           |                                 |           |                                                |           |
| <5 miles (including coresidence)                                        | ---                                  | ---       | ---                             | ---       | ---                                            | ---       |
| 6-20 miles                                                              | -0.388 *                             | -0.268    | -0.267                          | -0.185    | -0.03                                          | 0.01      |
| 21-120 miles                                                            | -0.86 ***                            | -1.05 *** | -0.67 ***                       | -0.66 *** | -0.01                                          | -0.24     |
| 121-1,000 miles                                                         | -1.90 ***                            | -1.99 *** | -1.42 ***                       | -1.18 *** | -0.61 ***                                      | -0.80 *** |
| >1,000 miles                                                            | -2.10 ***                            | -2.37 *** | -1.82 ***                       | -1.72 *** | -0.41 *                                        | -0.65 *** |
| Parental health: Poor/very poor (0 = <i>Excellent/good/fair</i> )       | 0.49 *                               | -0.28     | 0.50 *                          | 0.16      | 0.35                                           | 0.10      |
| Living siblings (0 = <i>No living siblings</i> )                        | 0.18                                 | -0.11 *** | -0.50 *                         | -0.06     | -0.09                                          | -0.08 **  |
| -2 log L                                                                | 1,499                                | 1,491     | 1,364                           | 1,287     | 1,599                                          | 1,648     |
| df                                                                      | 26                                   | 26        | 26                              | 26        | 26                                             | 26        |
| n                                                                       | 1,294                                | 1,294     | 1,294                           | 1,294     | 1,294                                          | 1,294     |

Note: The omitted marital status variable is "currently married in first marriage." Sample includes all respondents with a living parent in both 1993 and 2004.

\*  $p < .05$ . \*\*  $p < .01$ . \*\*\*  $p < .001$ .

Online Appendix Table 1b.

*Logistic Coefficients Predicting Provision of Specified Type of Help to Adult Children During the Past Month, Wisconsin Longitudinal Study Graduates, 1993 and 2004*

|                                                         | Transportation,<br>Errands, Shopping |          | Housework,<br>Yardwork, Repairs |          | Advice,<br>Encouragement,<br>Emotional support |           | Child care, Babysitting |           |
|---------------------------------------------------------|--------------------------------------|----------|---------------------------------|----------|------------------------------------------------|-----------|-------------------------|-----------|
|                                                         | 1993                                 | 2004     | 1993                            | 2004     | 1993                                           | 2004      | 1993                    | 2004      |
| Gender: Male                                            | 0.08                                 | 0.14     | 0.26 **                         | 0.55 *** | -0.45 ***                                      | -0.48 *** | -0.55 ***               | -0.04     |
| Marital status                                          |                                      |          |                                 |          |                                                |           |                         |           |
| Currently married, first marriage                       | ---                                  | ---      | ---                             | ---      | ---                                            | ---       | ---                     | ---       |
| Currently married, second or later marriage             | 0.02                                 | -0.20    | -0.33 *                         | -0.36 *  | 0.02                                           | 0.00      | -0.72 ***               | -0.96 *** |
| Previously married: Divorced/widowed/separated          | 0.25 *                               | -0.12    | 0.17                            | 0.05     | 0.25                                           | 0.00      | -0.17                   | -0.25 *   |
| Never married                                           | -1.01                                | -0.03    | -0.04                           | -0.21    | -1.38                                          | -1.46     | -0.55                   | -1.46     |
| Male * Currently married, second or later marriage      | -0.41 *                              | -0.30    | -0.29                           | -0.26    | -0.31                                          | 0.08      | 0.05                    | 0.05      |
| Male * Previously married: Divorced/widowed/separated   | -0.54 *                              | -0.12    | -0.86 **                        | -0.47 *  | -0.28                                          | -0.17     | -0.84 **                | -1.08 *** |
| Male * Never married                                    | 0.77                                 | 1.10     | 0.69                            | -10.36   | 0.49                                           | 1.44      | -10.31                  | 1.55      |
| Employment status                                       |                                      |          |                                 |          |                                                |           |                         |           |
| Not currently employed                                  | ---                                  | ---      | ---                             | ---      | ---                                            | ---       | ---                     | ---       |
| Currently employed part-time                            | 0.10                                 | 0.24 **  | -0.02                           | -0.07    | -0.15                                          | 0.14      | -0.29 *                 | 0.03      |
| Currently employed full-time                            | -0.24 *                              | -0.08    | -0.30 **                        | -0.17    | -0.19                                          | -0.02     | -0.12                   | -0.18 *   |
| Education: Years of education based on highest degree   |                                      |          |                                 |          |                                                |           |                         |           |
| High school grad or less than 1 year college            | ---                                  | ---      | ---                             | ---      | ---                                            | ---       | ---                     | ---       |
| 1-3 years college                                       | 0.25 **                              | 0.05     | 0.10                            | -0.06    | 0.43 ***                                       | 0.47 ***  | -0.16 ***               | -0.08     |
| Bachelor's degree                                       | 0.27 **                              | 0.09     | -0.02                           | -0.06    | 0.64 ***                                       | 0.67 ***  | -0.57 ***               | 0.06      |
| More than bachelor's degree                             | 0.40 ***                             | 0.06     | -0.02                           | -0.26 *  | 0.77 ***                                       | 0.79 ***  | -0.70                   | -0.06     |
| Household income in last 12 months                      |                                      |          |                                 |          |                                                |           |                         |           |
| <=\$25,000                                              | ---                                  | ---      | ---                             | ---      | ---                                            | ---       | ---                     | ---       |
| \$25,001-\$50,000                                       | -0.37                                | 0.07     | 0.11                            | -0.03    | 0.12                                           | -0.09     | 0.12                    | -0.12     |
| \$50,001-\$75,000                                       | 0.09                                 | 0.15     | 0.11                            | 0.04     | 0.22 *                                         | 0.01      | 0.23 *                  | 0.03      |
| \$75,001-\$100,000                                      | -0.06                                | 0.23     | 0.17                            | 0.06     | 0.42 ***                                       | 0.16      | 0.27 *                  | -0.03     |
| >\$100,000                                              | 0.09                                 | 0.27 *   | -0.14                           | 0.02     | 0.47 ***                                       | 0.29 **   | 0.12                    | 0.07      |
| Health status: Poor/very poor (0 = Excellent/good/fair) |                                      |          |                                 |          |                                                |           |                         |           |
| children)                                               | 0.48 ***                             | 0.71 *** | 0.14                            | 0.35 **  | 0.13 *                                         | 0.34 **   | 0.02                    | 0.08      |
| Number of married children                              | 0.03                                 | 0.04     | 0.20 ***                        | 0.11 *** | 0.11 ***                                       | 0.13 ***  | 0.82 ***                | 0.41 ***  |
| -2 log L                                                | 6,019                                | 5,705    | 4,579                           | 5,005    | 5,996                                          | 6,338     | 5,091                   | 6,237     |
| df                                                      | 19                                   | 19       | 19                              | 19       | 19                                             | 19        | 19                      | 19        |
| n                                                       | 4,747                                | 4,850    | 4,747                           | 4,850    | 4,747                                          | 4,850     | 4,747                   | 4,850     |

Note: The omitted marital status variable is "currently married in first marriage." Sample includes all respondents with an adult child.

\*  $p < .05$ . \*\*  $p < .01$ . \*\*\*  $p < .001$ .

Online Appendix Table 1c.

*Logistic Coefficients Predicting Provision of Specified Type of Help to Friends, Neighbors, and Coworkers During the Past Month, Wisconsin Longitudinal Study Graduates, 1993 and 2004*

|                                                                 | Transportation,<br>Errands, Shopping |           | Housework,<br>Yardwork, Repairs |           | Advice,<br>Encouragement,<br>Emotional support |           |
|-----------------------------------------------------------------|--------------------------------------|-----------|---------------------------------|-----------|------------------------------------------------|-----------|
|                                                                 | 1993                                 | 2004      | 1993                            | 2004      | 1993                                           | 2004      |
| Gender: Male                                                    | 0.04                                 | -0.55     | 1.18 ***                        | 1.28 ***  | -0.55 ***                                      | -0.70 *** |
| Marital status                                                  |                                      |           |                                 |           |                                                |           |
| Currently married, first marriage                               | ---                                  | ---       | ---                             | ---       | ---                                            | ---       |
| Currently married, second or later marriage                     | 0.12                                 | 0.24      | 0.29                            | 0.35      | 0.29 *                                         | 0.22      |
| Previously married: Divorced/widowed/separated                  | 0.48 ***                             | -0.37 *** | 0.58 ***                        | 0.19      | 0.63 ***                                       | 0.32 **   |
| Never married                                                   | 0.59 **                              | 0.77 ***  | 1.02 ***                        | 0.95 ***  | 0.69 **                                        | 0.02      |
| Male * Currently married, second or later marriage              | 0.11                                 | 0.01      | -0.40                           | -0.34     | -0.20                                          | -0.08     |
| Male * Previously married: Divorced/widowed/separated           | 0.26                                 | 0.25      | 0.12                            | 0.30      | -0.14                                          | 0.21      |
| Male * Never married                                            | -0.43                                | -0.06     | -1.07 **                        | -0.73 *   | -0.36                                          | 0.62 *    |
| Employment status                                               |                                      |           |                                 |           |                                                |           |
| Not currently employed                                          | ---                                  | ---       | ---                             | ---       | ---                                            | ---       |
| Currently employed part-time                                    | -0.05                                | -0.09     | -0.07                           | -0.25 **  | 0.25 *                                         | 0.23 **   |
| Currently employed full-time                                    | -0.20 *                              | -0.18 *   | -0.27 *                         | -0.51 *** | 0.23 *                                         | 0.31 ***  |
| Education: Years of education based on highest degree           |                                      |           |                                 |           |                                                |           |
| High school grad or less than 1 year college                    | ---                                  | ---       | ---                             | ---       | ---                                            | ---       |
| 1-3 years college                                               | 0.14                                 | 0.23 *    | -0.05                           | -0.07     | 0.48 ***                                       | 0.46 ***  |
| Bachelor's degree                                               | 0.18                                 | 0.10      | -0.06                           | -0.37 **  | 0.65 ***                                       | 0.67 ***  |
| More than bachelor's degree                                     | 0.39 ***                             | 0.35 ***  | 0.08                            | -0.08     | 0.99 ***                                       | 0.90 ***  |
| Household income in last 12 months                              |                                      |           |                                 |           |                                                |           |
| <=\$25,000                                                      | ---                                  | ---       | ---                             | ---       | ---                                            | ---       |
| \$25,001-\$50,000                                               | 0.08                                 | 0.04      | -0.18                           | -0.04     | 0.24 **                                        | 0.04      |
| \$50,001-\$75,000                                               | 0.06                                 | -0.02     | -0.10                           | 0.05      | 0.36 ***                                       | 0.06      |
| \$75,001-\$100,000                                              | 0.03                                 | 0.12      | -0.30 *                         | 0.04      | 0.33 **                                        | 0.22 *    |
| >\$100,000                                                      | -0.06                                | -0.10     | -0.45 **                        | -0.22     | 0.46 ***                                       | 0.06      |
| Health status: Poor/very poor (0 = Excellent/good/fair)         | 0.07                                 | -0.27 *   | -0.30                           | -0.45 **  | 0.08                                           | -0.09     |
| Coresident children (0 = No children or no coresident children) | 0.04                                 | -0.32 **  | -0.09                           | -0.37 *   | -0.06                                          | -0.16     |
| Number of married children                                      | -0.05                                | -0.03     | -0.08 *                         | -0.02     | -0.02                                          | -0.09 *** |
| -2 log L                                                        | 6,358                                | 5,971     | 4,628                           | 4,321     | 6,726                                          | 6,849     |
| df                                                              | 19                                   | 19        | 19                              | 19        | 19                                             | 19        |
| n                                                               | 5,220                                | 5,220     | 5,220                           | 5,220     | 5,220                                          | 5,220     |

Note: The omitted marital status variable is "currently married in first marriage." Sample includes all respondents.

\*  $p < .05$ . \*\*  $p < .01$ . \*\*\*  $p < .001$ .

Appendix Table 2a.

*Impact of Reducing Employment from Full-time to either Part-time or Retired between 1993 and 2004 on the Likelihood of Helping Parents in 2004, by Gender,<sup>a</sup>*  
*(Logistic Coefficients), Wisconsin Longitudinal Study Graduates, 1993 and 2004*

|                                                                         | Any Help to Parents |           | Transportation,<br>Errands, Shopping |           | Housework,<br>Yardwork, Repairs |           | Advice, Encouragement,<br>Emotional support |          |
|-------------------------------------------------------------------------|---------------------|-----------|--------------------------------------|-----------|---------------------------------|-----------|---------------------------------------------|----------|
|                                                                         | Women               | Men       | Women                                | Men       | Women                           | Men       | Women                                       | Men      |
| Employment status                                                       |                     |           |                                      |           |                                 |           |                                             |          |
| Currently employed full-time                                            | ---                 | ---       | ---                                  | ---       | ---                             | ---       | ---                                         | ---      |
| Currently employed part-time                                            | -0.01               | 0.53      | 0.23                                 | 0.41      | 0.43                            | 0.32      | -0.46                                       | 0.37     |
| Not currently employed                                                  | -0.11               | 0.40      | 0.16                                 | 0.34      | 0.26                            | 0.47      | -0.23                                       | 0.13     |
| Provided help to parents in 1993                                        | 1.02 ***            | 1.10 ***  | 0.73 **                              | 1.18 ***  | 0.83 **                         | 1.13 ***  | 0.77 ***                                    | 0.86 *** |
| Marital status                                                          |                     |           |                                      |           |                                 |           |                                             |          |
| Currently married, first marriage                                       | ---                 | ---       | ---                                  | ---       | ---                             | ---       | ---                                         | ---      |
| Currently married, second or later marriage                             | -0.42               | -0.27     | -0.27                                | -0.07     | 0.21                            | -0.64     | -0.18                                       | -0.09    |
| Previously married: Divorced/widowed/separated                          | 0.29                | -0.49     | 0.13                                 | -0.04     | -0.03                           | 0.03      | 0.40                                        | -0.54    |
| Never married                                                           | 0.07                | -0.29     | 0.15                                 | 0.02      | 1.17                            | 0.15      | 0.17                                        | -0.07    |
| Education: Years of education based on highest degree                   |                     |           |                                      |           |                                 |           |                                             |          |
| High school grad or less than 1 year college                            | ---                 | ---       | ---                                  | ---       | ---                             | ---       | ---                                         | ---      |
| 1-3 years college                                                       | -0.40               | 0.99 **   | -0.14                                | 0.80 *    | -0.23                           | 0.50      | 0.23                                        | 0.96 **  |
| Bachelor's degree                                                       | 0.19                | 0.93 **   | 0.14                                 | 0.04      | -0.19                           | 0.58      | 0.35                                        | 1.04 **  |
| More than bachelor's degree                                             | -0.21               | 0.93 **   | -0.26                                | 0.47      | -0.60                           | 0.31      | 0.35                                        | 0.82 **  |
| Household income in last 12 months                                      |                     |           |                                      |           |                                 |           |                                             |          |
| <=\$25,000                                                              | ---                 | ---       | ---                                  | ---       | ---                             | ---       | ---                                         | ---      |
| \$25,001-\$50,000                                                       | -0.06               | 0.13      | 0.07                                 | 0.23      | -0.33                           | 0.19      | -0.12                                       | 0.16     |
| \$50,001-\$75,000                                                       | 0.60                | 0.02      | 0.52                                 | 0.28      | -0.14                           | 0.09      | 0.47                                        | 0.05     |
| \$75,001-\$100,000                                                      | 0.76                | 0.10      | 0.62                                 | 0.48      | -0.18                           | -0.46     | 0.35                                        | 0.00     |
| >\$100,000                                                              | 0.35                | 0.52      | 0.46                                 | 0.50      | -0.04                           | -0.47     | -0.07                                       | 0.61     |
| Health status: Poor/very poor (0 = <i>Excellent/good/fair</i> )         | -1.06 *             | 0.32      | -1.18 *                              | 0.20      | -1.22 *                         | -0.28     | -1.00 *                                     | 0.44     |
| Coresident children (0 = <i>No children or no coresident children</i> ) | -0.34               | -0.02     | -0.29                                | -0.58     | -0.26                           | -0.25     | -0.21                                       | 0.18     |
| Number of married children                                              | 0.03                | 0.14      | 0.00                                 | 0.05      | -0.02                           | 0.05      | 0.03                                        | 0.03     |
| Parent's residence                                                      |                     |           |                                      |           |                                 |           |                                             |          |
| In own home (0 = <i>With graduate or other living situation</i> )       | 0.76 **             | 0.60 **   | 0.87 ***                             | 0.29      | 1.23 ***                        | 1.66 ***  | 0.39                                        | 0.12     |
| Proximity to parent's residence                                         |                     |           |                                      |           |                                 |           |                                             |          |
| <5 miles (including coresidence)                                        | ---                 | ---       | ---                                  | ---       | ---                             | ---       | ---                                         | ---      |
| 6-20 miles                                                              | -0.37               | -0.17     | -0.49                                | -0.15     | -0.20                           | -0.10     | 0.05                                        | 0.09     |
| 21-120 miles                                                            | -0.67 *             | -1.37 *** | -0.79 **                             | -1.52 *** | -0.41                           | -1.03 **  | -0.22                                       | -0.49    |
| 121-1,000 miles                                                         | -1.49 ***           | -1.47 *** | -2.00 ***                            | -1.53 *** | -0.56                           | -1.20 *** | -0.72 *                                     | -0.51    |
| >1,000 miles                                                            | -1.94 ***           | -1.50 *** | -2.36 ***                            | -2.28 *** | -1.46 **                        | -2.10 *** | -1.12 **                                    | -0.29    |
| Parental health: Poor/very poor (0 = <i>Excellent/good/fair</i> )       | -0.05               | -0.17     | 0.00                                 | -0.34     | 0.25                            | 0.11      | 0.13                                        | 0.26     |
| Living siblings (0 = <i>No living siblings</i> )                        | -0.06               | -0.08     | -0.06                                | -0.16 **  | -0.02                           | -0.07     | -0.03                                       | -0.05    |
| -2 log L                                                                | 501                 | 611       | 517                                  | 567       | 453                             | 459       | 562                                         | 609      |
| df                                                                      | 23                  | 23        | 23                                   | 23        | 23                              | 23        | 23                                          | 23       |
| n                                                                       | 446                 | 538       | 446                                  | 538       | 446                             | 538       | 446                                         | 538      |

<sup>a</sup> Sample is restricted to all respondents with a living parent in both 1993 and 2004, and who were working full time in 1993.

\*  $p < .05$ . \*\*  $p < .01$ . \*\*\*  $p < .001$ .

Appendix Table 2b.

Impact of Reducing Employment from Full-time to either Part-time or Retired between 1993 and 2004 on the Likelihood of Helping Adult Children in 2004, by Gender, <sup>a</sup>  
(Logistic Coefficients), Wisconsin Longitudinal Study Graduates, 1993 and 2004

|                                                                 | Any Help to Adult Children |           | Transportation, Errands, Shopping |           | Housework, Yardwork, Repairs |           | Advice, Encouragement, Emotional support |          | Child care, Babysitting |           |
|-----------------------------------------------------------------|----------------------------|-----------|-----------------------------------|-----------|------------------------------|-----------|------------------------------------------|----------|-------------------------|-----------|
|                                                                 | Women                      | Men       | Women                             | Men       | Women                        | Men       | Women                                    | Men      | Women                   | Men       |
| Employment status                                               |                            |           |                                   |           |                              |           |                                          |          |                         |           |
| Currently employed full-time                                    | ---                        | ---       | ---                               | ---       | ---                          | ---       | ---                                      | ---      | ---                     | ---       |
| Currently employed part-time                                    | 0.19                       | 0.24      | 0.43 *                            | 0.21      | -0.06                        | 0.14      | 0.10                                     | 0.36 *   | 0.35 *                  | 0.11      |
| Not currently employed                                          | -0.11                      | 0.30 *    | -0.04                             | 0.31 *    | 0.08                         | 0.26 *    | -0.16                                    | 0.20     | 0.08                    | 0.28 *    |
| Provided help to adult children in 1993                         | 1.06 ***                   | 0.92 ***  | 0.80 ***                          | 0.69 ***  | 0.49 *                       | 0.42 **   | 1.02 ***                                 | 0.79 *** | 0.44 **                 | 0.45 ***  |
| Marital status                                                  |                            |           |                                   |           |                              |           |                                          |          |                         |           |
| Currently married, first marriage                               | ---                        | ---       | ---                               | ---       | ---                          | ---       | ---                                      | ---      | ---                     | ---       |
| Currently married, second or later marriage                     | -0.51 **                   | -0.36 *   | -0.44 *                           | -0.54 *** | -0.46 *                      | -0.63 *** | 0.01                                     | 0.27 *   | -1.04 ***               | -0.88 *** |
| Previously married: Divorced/widowed/separated                  | -0.03                      | -0.77 *** | -0.23                             | -0.21     | -0.04                        | -0.37     | 0.06                                     | -0.08    | -0.31 *                 | -1.33 *** |
| Never married                                                   | -0.02                      | -12.07    | 0.52                              | -9.63     | 0.97                         | -10.09    | 0.80                                     | -11.05   | -12.75                  | -11.46    |
| Education: Years of education based on highest degree           |                            |           |                                   |           |                              |           |                                          |          |                         |           |
| High school grad or less than 1 year college                    | ---                        | ---       | ---                               | ---       | ---                          | ---       | ---                                      | ---      | ---                     | ---       |
| 1-3 years college                                               | 0.11                       | 0.41 *    | 0.37 *                            | -0.06     | 0.01                         | -0.09     | 0.28                                     | 0.61 *** | -0.16                   | 0.01      |
| Bachelor's degree                                               | 0.27                       | 0.23      | 0.31                              | -0.18     | 0.10                         | -0.52 **  | 0.76 ***                                 | 0.55 *** | 0.19                    | -0.10     |
| More than bachelor's degree                                     | 0.26                       | 0.35 *    | 0.36                              | -0.07     | -0.27                        | -0.44 **  | 0.52 **                                  | 0.96 *** | -0.23                   | -0.05     |
| Household income in last 12 months                              |                            |           |                                   |           |                              |           |                                          |          |                         |           |
| <=\$25,000                                                      | ---                        | ---       | ---                               | ---       | ---                          | ---       | ---                                      | ---      | ---                     | ---       |
| \$25,001-\$50,000                                               | -0.12                      | -0.09     | 0.00                              | 0.11      | -0.22                        | 0.07      | -0.01                                    | -0.16    | -0.06                   | -0.21     |
| \$50,001-\$75,000                                               | 0.26                       | 0.05      | -0.02                             | 0.32      | -0.11                        | 0.15      | 0.22                                     | -0.08    | 0.12                    | 0.08      |
| \$75,001-\$100,000                                              | 0.15                       | 0.06      | 0.41                              | 0.20      | 0.09                         | 0.10      | 0.18                                     | 0.10     | 0.09                    | 0.15      |
| >\$100,000                                                      | 0.04                       | 0.48 *    | 0.14                              | 0.42 *    | -0.20                        | 0.19      | 0.37                                     | 0.35 *   | 0.03                    | 0.22      |
| Health status: Poor/very poor (0 = Excellent/good/fair)         | -0.29                      | -0.12     | -0.09                             | -0.02     | -0.41                        | -0.34     | -0.06                                    | 0.14     | -0.23                   | -0.26     |
| Coresident children (0 = No children or no coresident children) | 0.58 *                     | 0.42 *    | 0.76 ***                          | 0.66 ***  | 0.61 **                      | -0.05     | 0.47 *                                   | 0.22     | 0.45 *                  | 0.00      |
| Number of married children                                      | 0.23 ***                   | 0.21 ***  | 0.03                              | 0.08 *    | 0.07                         | 0.13 **   | 0.06                                     | 0.10 **  | 0.37 ***                | 0.41 ***  |
| -2 log L                                                        | 1417                       | 1982      | 1692                              | 2304      | 1440                         | 2175      | 1883                                     | 2492     | 1939                    | 2453      |
| df                                                              | 16                         | 16        | 16                                | 16        | 16                           | 16        | 16                                       | 16       | 16                      | 16        |
| n                                                               | 1507                       | 1943      | 1507                              | 1943      | 1507                         | 1943      | 1507                                     | 1943     | 1507                    | 1943      |

<sup>a</sup> Sample is restricted to all respondents with an adult child who were working full time in 1993.

\*  $p < .05$ . \*\*  $p < .01$ . \*\*\*  $p < .001$ .

Appendix Table 2c.

Impact of Reducing Employment from Full-time to either Part-time or Retired between 1993 and 2004 on the Likelihood of Helping Friends, Neighbors, and Co-workers in 2004, by Gender, <sup>a</sup> (Logistic Coefficients), Wisconsin Longitudinal Study Graduates, 1993 a

|                                                                 | Any Help to Friends,<br>Neighbors, Co-workers |          | Transportation,<br>Errands, Shopping |          | Housework,<br>Yardwork, Repairs |          | Advice,<br>Encouragement,<br>Emotional support |          |
|-----------------------------------------------------------------|-----------------------------------------------|----------|--------------------------------------|----------|---------------------------------|----------|------------------------------------------------|----------|
|                                                                 | Women                                         | Men      | Women                                | Men      | Women                           | Men      | Women                                          | Men      |
| Employment status                                               |                                               |          |                                      |          |                                 |          |                                                |          |
| Currently employed full-time                                    | ---                                           | ---      | ---                                  | ---      | ---                             | ---      | ---                                            | ---      |
| Currently employed part-time                                    | -0.02                                         | 0.13     | -0.02                                | 0.12     | 0.10                            | 0.24     | -0.05                                          | -0.07    |
| Not currently employed                                          | -0.16                                         | -0.01    | 0.22                                 | 0.12     | 0.35                            | 0.57 *** | -0.26 *                                        | -0.34 ** |
| Provided help to friends/neighbors/coworkers in 1993            | 0.92 ***                                      | 0.72 *** | 0.85 ***                             | 0.71 *** | 0.84 ***                        | 0.47 *** | 0.79 ***                                       | 0.75 *** |
| Marital status                                                  |                                               |          |                                      |          |                                 |          |                                                |          |
| Currently married, first marriage                               | ---                                           | ---      | ---                                  | ---      | ---                             | ---      | ---                                            | ---      |
| Currently married, second or later marriage                     | 0.10                                          | 0.16     | 0.23                                 | 0.24     | 0.20                            | 0.00     | 0.21                                           | 0.10     |
| Previously married: Divorced/widowed/separated                  | 0.27 *                                        | 0.40 *   | 0.29 *                               | 0.51 **  | -0.15                           | 0.48 **  | 0.32 *                                         | 0.49 **  |
| Never married                                                   | 0.23                                          | 0.67 *   | 0.40                                 | 0.73 **  | 0.80 *                          | 0.05     | -0.10                                          | 0.67 *   |
| Education: Years of education based on highest degree           |                                               |          |                                      |          |                                 |          |                                                |          |
| High school grad or less than 1 year college                    | ---                                           | ---      | ---                                  | ---      | ---                             | ---      | ---                                            | ---      |
| 1-3 years college                                               | 0.33 *                                        | 0.29 *   | 0.17                                 | 0.27     | 0.12                            | 0.07     | 0.48 **                                        | 0.38 **  |
| Bachelor's degree                                               | 0.78 ***                                      | 0.17     | 0.14                                 | -0.05    | -0.36                           | -0.46 ** | 0.91 ***                                       | 0.46 *** |
| More than bachelor's degree                                     | 0.81 ***                                      | 0.39 **  | 0.44 *                               | 0.15     | 0.45                            | -0.27    | 0.96 ***                                       | 0.73 *** |
| Household income in last 12 months                              |                                               |          |                                      |          |                                 |          |                                                |          |
| <=\$25,000                                                      | ---                                           | ---      | ---                                  | ---      | ---                             | ---      | ---                                            | ---      |
| \$25,001-\$50,000                                               | 0.02                                          | 0.12     | -0.02                                | 0.05     | -0.32                           | 0.24     | 0.05                                           | 0.14     |
| \$50,001-\$75,000                                               | 0.09                                          | -0.08    | 0.03                                 | -0.17    | -0.30                           | 0.21     | 0.19                                           | -0.01    |
| \$75,001-\$100,000                                              | 0.00                                          | 0.23     | -0.05                                | -0.09    | -0.54                           | 0.23     | 0.01                                           | 0.14     |
| >\$100,000                                                      | -0.08                                         | 0.05     | -0.39                                | -0.16    | -1.25 ***                       | 0.02     | 0.04                                           | 0.05     |
| Health status: Poor/very poor (0 = Excellent/good/fair)         | -0.12                                         | -0.16    | -0.36                                | -0.15    | -0.97 *                         | -0.29    | 0.11                                           | -0.22    |
| Coresident children (0 = No children or no coresident children) | -0.29                                         | 0.04     | -0.57 *                              | -0.03    | -1.31 *                         | 0.05     | -0.21                                          | -0.08    |
| Number of married children                                      | -0.06                                         | -0.03    | -0.10 *                              | -0.02    | 0.00                            | 0.00     | -0.08 *                                        | -0.07    |
| -2 log L                                                        | 2099                                          | 2837     | 1906                                 | 2388     | 1011                            | 2302     | 2165                                           | 2714     |
| df                                                              | 16                                            | 16       | 16                                   | 16       | 16                              | 16       | 16                                             | 16       |
| n                                                               | 1686                                          | 2144     | 1686                                 | 2144     | 1686                            | 2144     | 1686                                           | 2144     |

<sup>a</sup> Sample is restricted to respondents who were working full time in 1993.

\*  $p < .05$ . \*\*  $p < .01$ . \*\*\*  $p < .001$ .
